# Supplementary material
Source: PubMed Central journal article supplement (PMC4850548)
Supplement: NIHMS779651-supplement-supplement_1.pdf [file NIHMS779651-supplement-supplement_1.pdf]

**ONLINE SUPPLEMENTAL MATERIAL**

**Table 1.** Population-Based Data Used to Estimate the Annual Rates of Breast Milk-Acquired CMV Infection, CMV-Related Symptoms, and CMV-SLS in the United States

| Maternal Race/ethnicity | Maternal age | Birth prevalence of congenital CMV infection <sup>22</sup> (%) | CMV seropositivity proportion among mothers <sup>19</sup> (%) | Breast milk feeding rates of VLBW infants <sup>23</sup> (%) | VLBW and premature infants (Birth weight <1500g and gestational age <32 weeks) <sup>24</sup> |      |                     |
|-------------------------|--------------|----------------------------------------------------------------|---------------------------------------------------------------|-------------------------------------------------------------|----------------------------------------------------------------------------------------------|------|---------------------|
|                         |              |                                                                |                                                               |                                                             | n                                                                                            | (%)  | % among live births |
| Non-Hispanic White      | <20          | 0.6                                                            | 39.0                                                          |                                                             | 2,149                                                                                        | (5)  | 1.3                 |
|                         | 20-29        | 0.9                                                            | 43.3                                                          |                                                             | 10,252                                                                                       | (24) | 0.9                 |
|                         | 30-39        | 0.9                                                            | 50.6                                                          |                                                             | 7,926                                                                                        | (18) | 0.9                 |
|                         | 40-49        | 1.0                                                            | 61.1                                                          |                                                             | 944                                                                                          | (2)  | 1.4                 |
|                         | Subtotal     | 0.9                                                            |                                                               | 63.1                                                        | 21,271                                                                                       | (49) | 0.9                 |
| Non-Hispanic Black      | <20          | 1.8                                                            | 57.4                                                          |                                                             | 2,605                                                                                        | (6)  | 2.4                 |
|                         | 20-29        | 1.3                                                            | 82.2                                                          |                                                             | 8,220                                                                                        | (19) | 2.3                 |
|                         | 30-39        | 1.4                                                            | 86.6                                                          |                                                             | 4,357                                                                                        | (10) | 2.9                 |
|                         | 40-49        | 1.4                                                            | 94.7                                                          |                                                             | 473                                                                                          | (1)  | 3.6                 |
|                         | Subtotal     | 1.5                                                            |                                                               | 45.2                                                        | 15,655                                                                                       | (36) | 2.5                 |
| Mexican American*       | <20          | 1.2                                                            | 69.9                                                          |                                                             | 1,010                                                                                        | (2)  | 1.0                 |
|                         | 20-29        | 1.4                                                            | 82.5                                                          |                                                             | 2,956                                                                                        | (7)  | 0.8                 |
|                         | 30-39        | 1.4                                                            | 89.5                                                          |                                                             | 1,948                                                                                        | (5)  | 1.0                 |
|                         | 40-49        | 1.4                                                            | 93.2                                                          |                                                             | 197                                                                                          | (1)  | 1.5                 |
|                         | Subtotal     | 1.3                                                            |                                                               | 58.3                                                        | 6,111                                                                                        | (15) | 0.9                 |
| Overall                 | <20          |                                                                |                                                               | 39.9                                                        | 5,764                                                                                        | (13) | 1.5                 |
|                         | 20-29        |                                                                |                                                               | 58.5                                                        | 21,428                                                                                       | (50) | 1.1                 |
|                         | 30-39        |                                                                |                                                               | 67.5                                                        | 14,231                                                                                       | (33) | 1.2                 |
|                         | 40-49        |                                                                |                                                               | 64.2                                                        | 1,614                                                                                        | (4)  | 1.8                 |
|                         | Total        | 1.0                                                            |                                                               |                                                             | 43,048                                                                                       |      | 1.2                 |

Data sources: Birth prevalence of congenital CMV<sup>22</sup> and CMV seropositivity proportion among mothers<sup>19</sup> - 3rd National Health and Nutrition Examination Survey; breast milk feeding rates of VLBW infants - California Perinatal Quality Care Collaborative, 2005-2006<sup>23</sup>; number and rates of VLBW and premature infants – National Vital Statistics, 2008<sup>24</sup>

**Table 2.** Meta-analysis limited to the 13 studies that ruled out CMV infection through transfused blood products or that attempted to prevent such by using CMV seronegative or leukocyte-reduced blood products

|                                                                                                           | Study, year of publication<br>Country                              | Infants fed<br>breast milk<br>from CMV-<br>seropositive<br>mothers<br>n | Infants<br>with breast<br>milk-<br>acquired<br>CMV<br>infection<br>n (%) | Infants<br>with<br>CMV-<br>related<br>symptoms <sup>a</sup><br>n (%) | Infants<br>with<br>CMV-<br>SLS <sup>b</sup><br>n (%) |
|-----------------------------------------------------------------------------------------------------------|--------------------------------------------------------------------|-------------------------------------------------------------------------|--------------------------------------------------------------------------|----------------------------------------------------------------------|------------------------------------------------------|
| <i>Untreated<br/>breast milk</i>                                                                          | Hamprecht, 2001<br>Germany <sup>8</sup>                            | 90                                                                      | 33 (37)                                                                  | 16 (18)                                                              | 4 (4)                                                |
|                                                                                                           | Meier, 2005<br>Germany <sup>9</sup>                                | 21                                                                      | 5 (24)                                                                   | 2 (10)                                                               | 1 (5)                                                |
|                                                                                                           | Miron, 2005<br>Israel <sup>26</sup>                                | 70                                                                      | 4 (6)                                                                    | 3 (4)                                                                | 1 (1)                                                |
|                                                                                                           | Croly-Labourdette, 2006<br>France <sup>10</sup>                    | 7                                                                       | 1(14)                                                                    | 0 (0)                                                                | 0 (0)                                                |
|                                                                                                           | Capretti, 2009<br>Italy <sup>11</sup>                              | 62                                                                      | 9 (15)                                                                   | 8 (13)                                                               | 3 (5)                                                |
|                                                                                                           | <b>Overall (n)</b>                                                 | <b>250</b>                                                              | <b>52</b>                                                                | <b>29</b>                                                            | <b>9</b>                                             |
|                                                                                                           | <b><i>Pooled proportion from meta-<br/>analysis, % (95%CI)</i></b> |                                                                         | <b>18 (8-34)</b>                                                         | <b>11 (7-19)</b>                                                     | <b>4 (2-11)</b>                                      |
|                                                                                                           | <b><i>I<sup>2</sup></i></b>                                        |                                                                         | <b>81</b>                                                                | <b>38</b>                                                            | <b>0</b>                                             |
| <i>Frozen breast<br/>milk</i>                                                                             | Yasuda, 2003<br>Japan <sup>12</sup>                                | 34                                                                      | 3 (9)                                                                    | 0 (0)                                                                | 0 (0)                                                |
|                                                                                                           | Lee, 2007<br>USA <sup>27</sup>                                     | 23                                                                      | 2 (9)                                                                    | 1 (4)                                                                | 0 (0)                                                |
|                                                                                                           | Buxmann, 2009<br>Germany <sup>28</sup>                             | 35                                                                      | 5 (14)                                                                   | 2 (6)                                                                | 0 (0)                                                |
|                                                                                                           | <b>Overall (n)</b>                                                 | <b>92</b>                                                               | <b>10</b>                                                                | <b>3</b>                                                             | <b>0</b>                                             |
|                                                                                                           | <b><i>Pooled proportion from meta-<br/>analysis, % (95%CI)</i></b> |                                                                         | <b>11 (6-20)</b>                                                         | <b>4 (2-12)</b>                                                      | <b>2 (0-27)</b>                                      |
|                                                                                                           | <b><i>I<sup>2</sup></i></b>                                        |                                                                         | <b>0</b>                                                                 | <b>0</b>                                                             | <b>0</b>                                             |
| <i>Combinations<br/>of untreated,<br/>frozen, or<br/>pasteurized<br/>breast milk or<br/>non-specified</i> | Mosca, 2001<br>Italy <sup>16</sup>                                 | 30                                                                      | 5 (17)                                                                   | 0 (0)                                                                | 0 (0)                                                |
|                                                                                                           | Sharland, 2002<br>UK <sup>29</sup>                                 | 18                                                                      | 1(6)                                                                     | 0 (0)                                                                | 0 (0)                                                |
|                                                                                                           | Doctor, 2005<br>Canada <sup>30</sup>                               | 61                                                                      | 4 (7)                                                                    | 1 (2)                                                                | 1 (2)                                                |
|                                                                                                           | Omarsdottir, 2007<br>Sweden <sup>17</sup>                          | 7                                                                       | 2 (29)                                                                   | 1 (14)                                                               | 1 (14)                                               |
|                                                                                                           | Hayashi, 2011                                                      | 22                                                                      | 1 (5)                                                                    | 1 (5)                                                                | 0 (0)                                                |

| Japan <sup>31</sup>                                    |            |                  |                 |                |
|--------------------------------------------------------|------------|------------------|-----------------|----------------|
| <i>Overall (n)</i>                                     | <i>138</i> | <i>13</i>        | <i>3</i>        | <i>2</i>       |
| <i>Pooled proportion from meta-analysis, % (95%CI)</i> |            | <b>11 (6-20)</b> | <b>4 (1-10)</b> | <b>3 (1-9)</b> |
| <i>I<sup>2</sup></i>                                   |            | <b>27</b>        | <b>0</b>        | <b>0</b>       |

<sup>a</sup> CMV-related symptoms defined as any of the following: neutropenia, thrombocytopenia, petechiae, hepatopathy, hyperbilirubinemia, elevated liver enzymes, jaundice or CMV pneumonia

<sup>b</sup> CMV-SLS defined as sepsis-like symptoms, such as bradycardia, apnea or respiratory deterioration, in the absence of bacterial infection and coincident with CMV viruria.
